# Supplementary material for: Situational analysis of clinical education at teaching hospitals based on the standards of the Ministry of Health and Medical Education in Iran University of Medical Sciences
Source: Research Square preprint supplement (doi:10.21203/rs.3.rs-6446554/v1), 2025-06-26
Supplement: Supplementary file 1 [file 3f7a1c8d10a0ed6e17888c5c.docx]

Dear Faculty members,

The questionnaire is devised to evaluate the degree of adherence to the standards of clinical education across a range of clinical settings, including clinical rounds, morning reports, journal clubs, grand rounds and clinical skills centers. All data will be treated in strict confidence; respondents have the option to decline participation or withdraw from the questionnaire at any stage.

Faculty members’ degree:

Coach🗖 Associate professors🗖 Assistant professors Professors 🗖

| No. | Items | Yes | No |
| --- | --- | --- | --- |
| **Clinical round** | | | |
| 1 | Do you participate in teaching rounds in hospitals? |  |  |
| 2 | Do you select patients based on their academic level and educational goals? |  |  |
| 3 | Do you do practice rounds after the work round? |  |  |
| 4 | Do you discuss patients in separate rooms after the visit? |  |  |
| 5 | Do you attend hospital teaching rounds? |  |  |
| **Outpatient round** | | | |
| The number of examination rooms in educational clinics....  The number of professors per student in the clinic...  The number of patients per student in the clinic | | | |
| 1 | Have you participated in clinical training workshops? |  |  |
| 2 | Do you present a lesson plan or course plan to students before the start of the course (including course objectives, teaching method, assessment method) |  |  |
| 3 | Have you developed a study guide for internships and apprenticeships students? |  |  |
| 4 | Do you have access to scientific resources in educational clinics? |  |  |
| 5 | Is the ratio of teacher to student, which should be one to five, observed in educational clinics? |  |  |
| 6 | Is the patient-to-student-professor ratio appropriate? |  |  |
| 7 | Do you use interactive methods to teach students in the clinic? |  |  |
| 8 | Do you give feedback to the student after taking the history and examination and reporting of patients |  |  |
| 9 | Do you hold case reports daily in clinics? |  |  |
| 10 | Do you use a logbook to monitor student performance in the clinic? |  |  |
| 11 | Do you use Portfolio to monitor student performance in the clinic? |  |  |
| 12 | Do you use the Tutor Report to monitor student performance in the clinic? |  |  |
| **Grand Round** | | | |
| 1 | Is the Grand Round held in the teaching hospital? |  |  |
| 2 | Does the time of the Grand Round not interfere with the schedule of classrooms and clinical rounds? |  |  |
| 3 | Are grand rounds based on the most up-to-date evidence discussed? |  |  |
| 4 | The venue of the grand rounds is equipped with educational aids. |  |  |
| 5 | Are different specialties invited in the Grand Rounds? |  |  |
| **Morning report** | | | |
| 1 | Do you hold morning reports based on students' educational goals? |  |  |
| 2 | Do you hold regularly morning reports at the wards? |  |  |
| 3 | Does participate the master of night shift at the morning report? |  |  |
| 4 | Do you give the necessary feedback to the students at the end of the session? |  |  |
| 5 | Do you remind and summarize the training tips at the end of the session? |  |  |
| 6 | At the end of the session, do you help to enrich the session by expressing your previous experiences about the presented case and practical tips? |  |  |
| 7 | Do you organize a separate meeting each month on how to follow up on cases reported in the morning reports? |  |  |
| **Journal club** | | | |
| 1 | Have you attended evidence-based workshops? |  |  |
| 2 | Do you read the club's journal articles prior to the meeting in order to identify educational aspects and critique the article? |  |  |
| **Clinical Skills Centres** | | | |
| 1 | In the Clinical Skills Centres, do you first role-play the desired function with the necessary explanations (rule model)? |  |  |
| 2 | Do you supervise students as they perform the desired performance and give them corrective feedback as they perform the performance? |  |  |
| 3 | Do you give students enough time to fully learn the performance in clinical skills centres? |  |  |
| 4 | Do you use different teaching methods such as small group learning? |  |  |
| 5 | Do you use clinical performance assessment methods such as DOPs 1, OSATS 2 and PSLB 3 to assess functional skills? |  |  |

Dear Students,

The questionnaire is devised to evaluate the degree of adherence to the standards of clinical education across a range of clinical settings, including clinical rounds, morning reports, journal clubs, grand rounds and clinical skills centers. All data will be treated in strict confidence; respondents have the option to decline participation or withdraw from the questionnaire at any stage.

Medical students’ degree: interns🗖 stagers🗖

| No. | Items | | | Yes | | No |
| --- | --- | --- | --- | --- | --- | --- |
| **Outpatient’s round** | | | | | | |
| 1 | Is the training round held in the presence of the professor in the hospitals? | | |  | |  |
| 2 | Are training rounds held in the presence of patients? | | |  | |  |
| 3 | Does the professor select patients based on the students' academic level and their educational goals? | | |  | |  |
| 4 | How much light and silence are needed for the training rounds? | | |  | |  |
| 5 | Do you have access to examination tools including sphygmomanometer, ophthalmoscope, stethoscope, reflex hammer and Negatoscope  in training rounds? | | |  | |  |
| 6 | Are there training rounds after the work round? | | |  | |  |
| 7 | Does the professor introduce himself and the students to the patient before starting? | | |  | |  |
| 8 | Does the professor explain about the educational nature of the visit to the patient? | | |  | |  |
| 9 | Does it allow the patient to be visited and trained? | | |  | |  |
| 10 | Are patients discussed in a separate room after the visit? | | |  | |  |
| **Clinical round** | | | | | | |
| Number of professors: Number of Residents: Number of interns:  Number of stagers:  The area of the teaching department of the clinic............ square meters | | | | | | |
| 1 | | Is offered lesson plan or course plan (including course objectives, training method, and assessment method) for you before the start of the course? |  | |  | |
| 2 | | Is offered a study guide before you start your internship rotation? |  | |  | |
| 3 | | Do you have access to scientific resources in educational clinics? |  | |  | |
| 4 | | Is it observed teacher to student ratio (ratio 1 to 5) in educational clinics? |  | |  | |
| 5 | | Is done visiting patients by you under the supervision of a master? |  | |  | |
| 6 | | Whether in the presence of the patient or at the end of the clinical round performed obtaining a history and initial examination of the patient by the student? |  | |  | |
| 7 | | Is the feedback provided by the professor after taking the student's history, examination and report? |  | |  | |
| 8 | | Is the case report held daily at the departments? |  | |  | |
| 9 | | Are you able to manage a common patient independently at the end of the workflow? |  | |  | |
| 10 | | Are you able to independently manage a patient at the end of the workflow? |  | |  | |
| 11 | | Is the Tutor Report used to check your performance in the ward or clinic? |  | |  | |
| 12 | | Is the Portfolio used to check your performance in the ward or clinic? |  | |  | |
| 13 | | Is the Logbook used to check your performance in the ward or clinic? |  | |  | |
| **Morning report** | | | | | | |
| What average number of occasions each week is the morning report hold?...... | | | | | | |
| 1 | Is the morning report held regularly? | | |  | |  |
| 2 | Are the interns' training goals notices in the morning report sessions? | | |  | |  |
| 3 | Do the senior assistant and the responsible professor and all the night shift interns attend the morning reporting sessions? | | |  | |  |
| 4 | Are the cases selected for the sessions, is of the rare type or in accordance with the training needs of interns? | | |  | |  |
| 5 | Do challenge students during the morning reporting session on issues they have already learned? | | |  | |  |
| 6 | Is mentioned to the credible evidence in summarizing the results of the morning report? | | |  | |  |
| 7 | Are reminder manager training tips at the end? | | |  | |  |
| 8 | How much equipped the place of the morning report to equipment such as examination beds - Negatoscopes and computers? | | |  | |  |
| **Grand Round** | | | | | | |
| How many patients are presented and discussed at each grand rounds meeting?................ | | | | | | |
| 1 | Is the Grand Round held in the teaching hospital? | | |  | |  |
| 2 | Does the time of the Grand Round not interfere with the schedule of classrooms and clinical rounds? | | |  | |  |
| 3 | Are grand rounds based on the most up-to-date evidence discussed? | | |  | |  |
| 4 | The venue of the grand rounds is equipped with educational aids. | | |  | |  |
| 5 | Are different specialties invited in the Grand Rounds? | | |  | |  |
| **Journal club** | | | | | | |
| What average number of occasions per month is the journal club hold?...... | | | | | | |
| 1 | The hall of journal clubs is equipped with the necessary equipment, such as computers, internet access and a projector. | | |  | |  |
| 2 | The arrangement of seats in the hall of journal clubs is U-shaped. | | |  | |  |
| 3 | The meetings of the journal clubs are held at specific times and according to a schedule. | | |  | |  |
| 4 | There is an article bank to register articles presented in journal clubs. | | |  | |  |
| **Clinical skills center** | | | | | | |
| 1 | Does the clinical skills centre have a manager to set up programmes and a secretary to coordinate with students? | | |  | |  |
| 2 | Does the clinical skills centre have sufficient space to maintain equipment and train students? | | |  | |  |
| 3 | Does the clinical skills centre have manikins for intravenous injection, breast examination, vaginal rectal examination for women and prostate examination for men? | | |  | |  |
| 4 | Does the clinical skills centre have sufficient examination equipment for students? | | |  | |  |
| 5 | Is the clinical skills centre equipped with audiovisual and internet facilities? | | |  | |  |
| 6 | Does the clinical skills centre have a manager to set up programmes and a secretary to coordinate with students? | | |  | |  |
| 7 | Does the clinical skills centre have sufficient space to maintain equipment and train students? | | |  | |  |
| 8 | Does the clinical skills centre have manikins for intravenous injection, breast examination, vaginal rectal examination for women and prostate examination for men? | | |  | |  |
